# Supplementary material for: Electrochemical cell lysis device for DNAextraction
Source: Royal Society of Chemistry journal article supplement (doi:10.1039/b916606h), 2009-12-17
Supplement: b916606h.pdf [file b916606h.pdf]

# Electronic supplementary information (ESI): electrochemical cell lysis device for DNA extraction

*Hun Joo Lee,<sup>ab</sup> Joon-Ho Kim,<sup>\*a</sup> Hee Kyun Lim,<sup>a</sup> Eun Chol Cho,<sup>a</sup> Nam Huh,<sup>a</sup>*

*Christopher Ko,<sup>a</sup> Jae Chan Park,<sup>a</sup> Jeong-Woo Choi<sup>b</sup> and Soo Suk Lee<sup>\*a</sup>*

<sup>a</sup> Bio & Health Lab, Samsung Advanced Institute of Technology, Samsung Electronics Co., Ltd.,

San #14-1, Nongseo-dong, Giheung-gu, Yongin-si, Gyeonggi-do, Republic of Korea

<sup>b</sup> Department of Integrated Biotechnology, Sogang University, 1 Shinsu-dong, Mapo-gu,

Seoul, Republic of Korea

\* Corresponding authors. Email: [soosuk@samsung.com](mailto:soosuk@samsung.com), Phone: +82-31-280-6947, Fax: +82-31-6816;

Email: [mythos.kim@samsung.com](mailto:mythos.kim@samsung.com), Phone: +82-31-280-6939, Fax : +82-31-6816

## Tables

**Table S1. The electrochemical devices with different size and shape**

| <b>Device no.</b> | <b>Device shape</b> | <b>Electrode distance</b> | <b>Electrode width</b> |
|-------------------|---------------------|---------------------------|------------------------|
| <b>1</b>          | □                   | 1 mm                      | 1 mm                   |
| <b>2</b>          | □                   | 1 mm                      | 0.5 mm                 |
| <b>3</b>          | □                   | 0.5 mm                    | 1 mm                   |
| <b>4</b>          | □                   | 0.5 mm                    | 0.5 mm                 |
| <b>5</b>          | Π                   | 1 mm                      | 1 mm                   |
| <b>6</b>          | Π                   | 1 mm                      | 0.5 mm                 |
| <b>7</b>          | Π                   | 0.5 mm                    | 1 mm                   |
| <b>8</b>          | Π                   | 0.5 mm                    | 0.5 mm                 |

\* □: Closed electrodes

\*\* Π: Open electrodes

## Figures

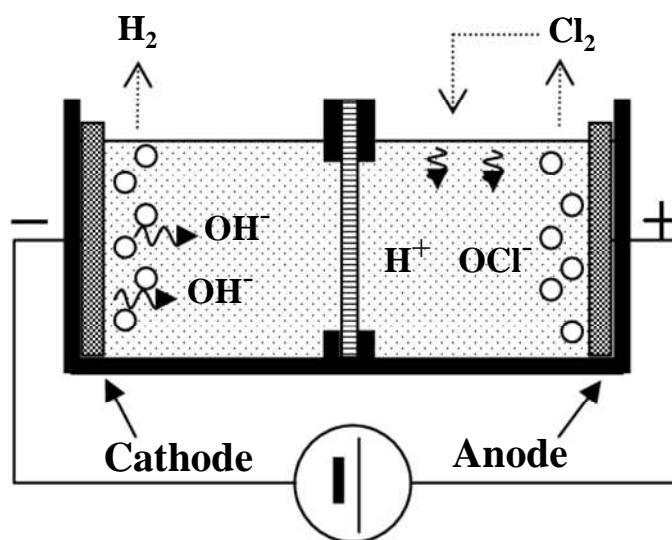

**Fig. S1** Apparatus to prepare the electrolyzed solutions. At the cathode chamber, hydroxide ions were generated to form ECS. At the anode chamber, hydrogen ions and HOCl were produced to form EAS.

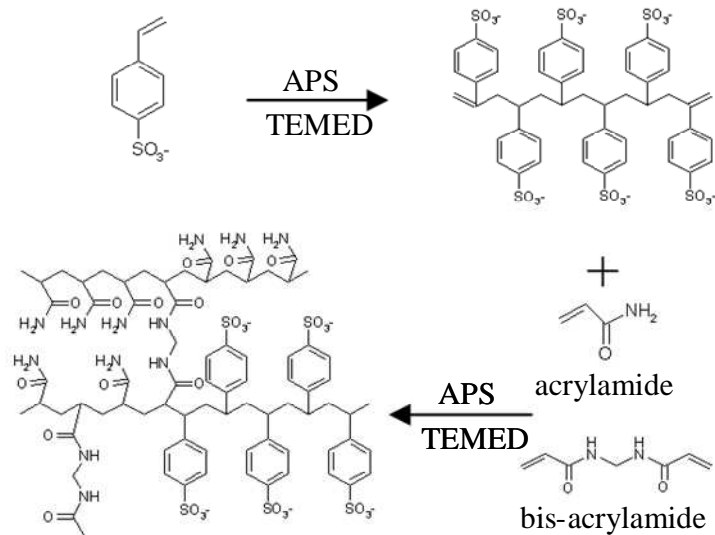

**Fig. S2** Reaction scheme to synthesize the ion exchangeable polymer. After polymerization of SVS at 70 °C, acrylamide and BIS were added. APS and TEMED served as initiator and accelerator, respectively.

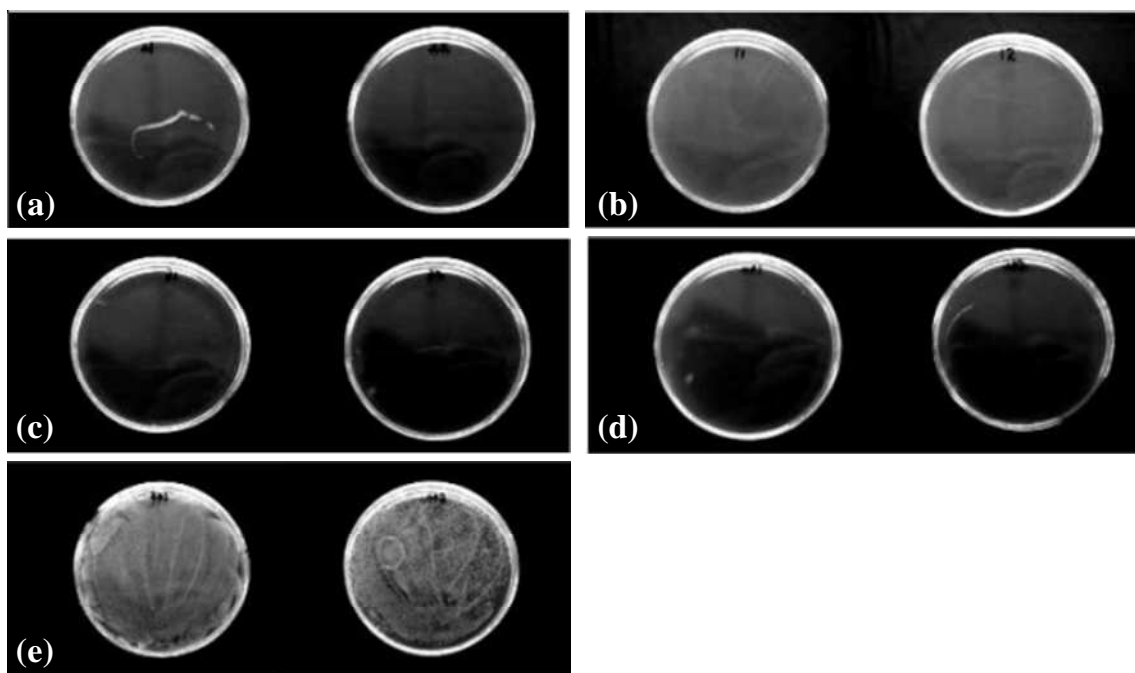

**Fig. S3** Images of *E. coli* cells after overnight incubation at 37 °C. Cell densities in the left Petri dishes and the right Petri dishes in each image were  $10^8$  cell/ml and  $10^7$  cells/ml, respectively. Cells were pretreated with (a) ECS, (b) EAS, (c) ETS, or (d) boiling. (e) Control cells without any pre-treatment.

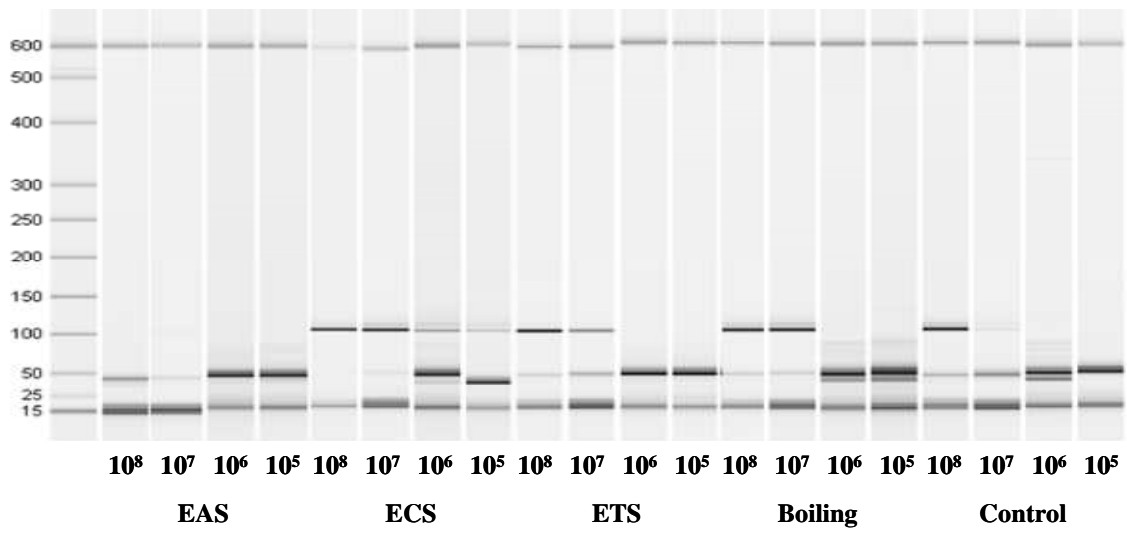

**Fig. S4** Labchip analysis of PCR amplicons from treated cells of various concentrations ( $10^8$ ,  $10^7$ ,  $10^6$  and  $10^5$  cells/ml).

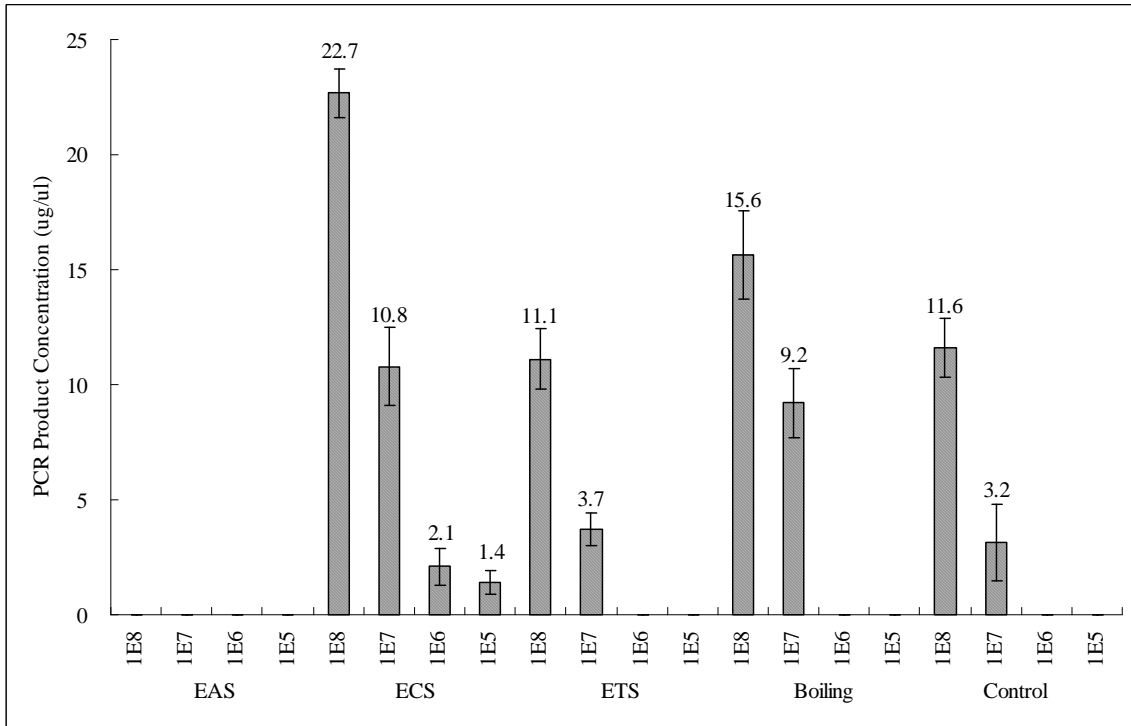

**Fig. S5** Labchip analysis of PCR product concentrations from treated cells of various concentrations ( $10^8$ ,  $10^7$ ,  $10^6$  and  $10^5$  cells/ml). Three repetitions were performed.

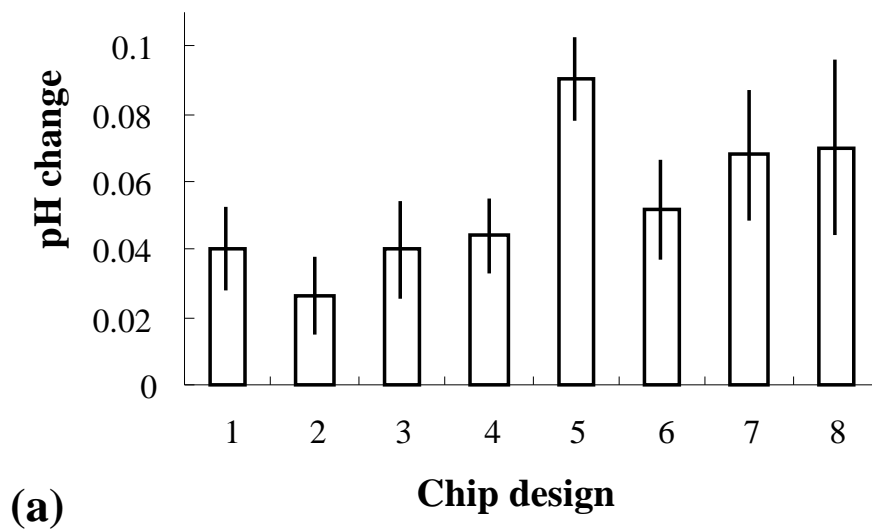

**Fig. S6a** Efficiency of pH maintenance in the cathode chamber. Three repetitions were performed.

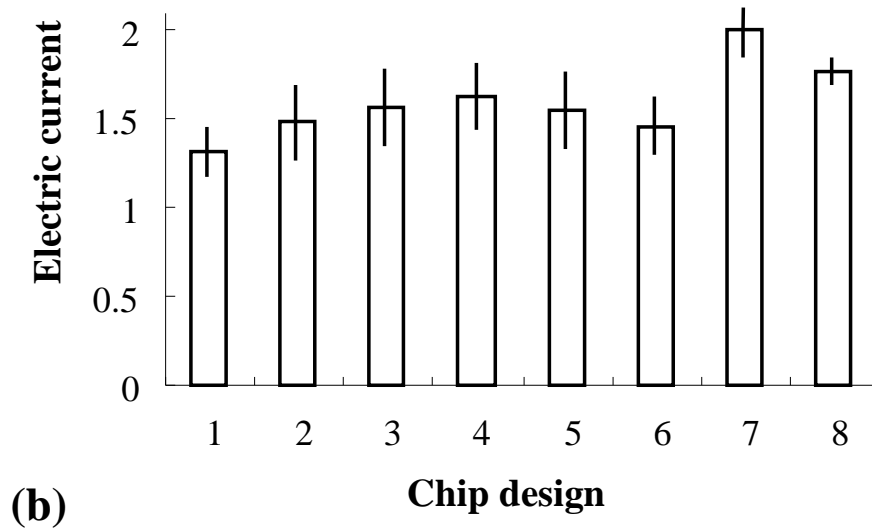

**Fig. S6b** Electric current flow between the cathode and the anode chambers. Three repetitions were performed.
